# Supplementary material for: Total Flavonoids of Rhizoma Drynariae Mitigates Aflatoxin B1-Induced Liver Toxicity in Chickens via Microbiota-Gut-Liver Axis Interaction Mechanisms
Source: MDPI journal article supplement (doi:10.3390/antiox12040819), 2023-03-28
Supplement: s1 [file s1]

1     **Total flavonoids of *Rhizoma Drynariae* mitigate aflatoxin B1-induced**  
2     **liver toxicity in chickens via microbiota-gut-liver axis interaction**  
3                                   **mechanisms**

4     Shucheng Huang<sup>1</sup>, Luxi Lin<sup>1</sup>, Shiqiong Wang<sup>2</sup>, Wenli Ding<sup>1</sup>, Chaodong Zhang<sup>1</sup>, Aftab Shaukat<sup>3</sup>,  
5     Bowen Xu<sup>1</sup>, Ke Yue<sup>1</sup>, Cai Zhang<sup>4</sup>, Fang Liu<sup>1\*</sup>

6     <sup>1</sup> College of Veterinary Medicine, Henan Agricultural University, Zhengzhou 450046, China;

7     <sup>2</sup> College of Food Science and Technology, Henan Agricultural University, Zhengzhou 450002,  
8     China;

9     <sup>3</sup> National Center for International Research on Animal Genetics, Breeding and Reproduction  
10    (NCIRAGBR), Huazhong Agricultural University, Wuhan 430070, China;

11   <sup>4</sup> Laboratory of Environment and Livestock Products, Henan University of Science and  
12   Technology, Luoyang 471023, China.

13   \* **Corresponding author:**

14   Dr. Fang Liu

15   No.15 Longzihu University Area, Zhengdong New District, Henan Agricultural University,  
16   Zhengzhou 450046, China.

17   E-mail: liufang.vet@henau.edu.cn

18   Tel: +86-13903831328

19     **Supplemental materials**

20

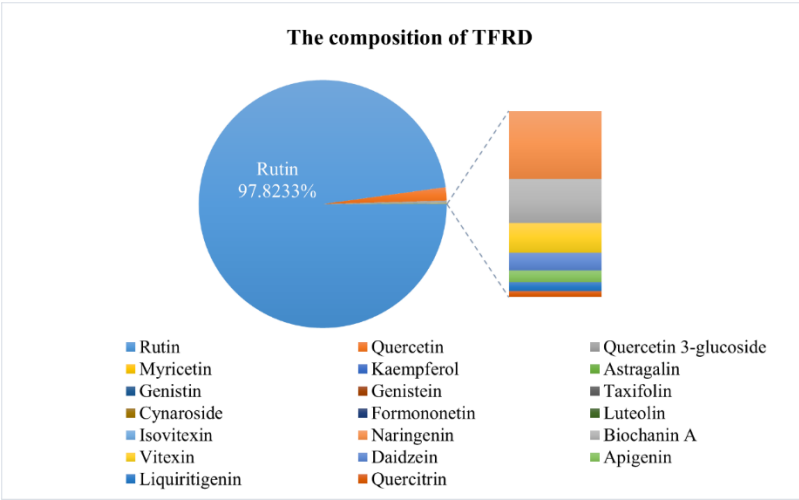

21     **Fig. S1** Composition and percentage of components of TFRD.

22     **Table S1** Composition and percentage of components of TFRD.

| Composition           | Percentage (%) |
|-----------------------|----------------|
| Rutin                 | 97.8233        |
| Quercetin             | 1.7228         |
| Quercetin 3-glucoside | 0.2727         |
| Myricetin             | 0.0468         |
| Kaempferol            | 0.0365         |
| Astragalin            | 0.0362         |
| Genistin              | 0.0193         |
| Genistein             | 0.0116         |
| Taxifolin             | 0.0069         |
| Cynaroside            | 0.0054         |
| Formononetin          | 0.0045         |
| Luteolin              | 0.0044         |
| Isovitexin            | 0.0032         |
| Naringenin            | 0.0023         |
| Biochanin A           | 0.0015         |
| Vitexin               | 0.001          |
| Daidzein              | 0.0006         |
| Apigenin              | 0.0004         |
| Liquiritigenin        | 0.0003         |
| Quercitrin            | 0.0002         |

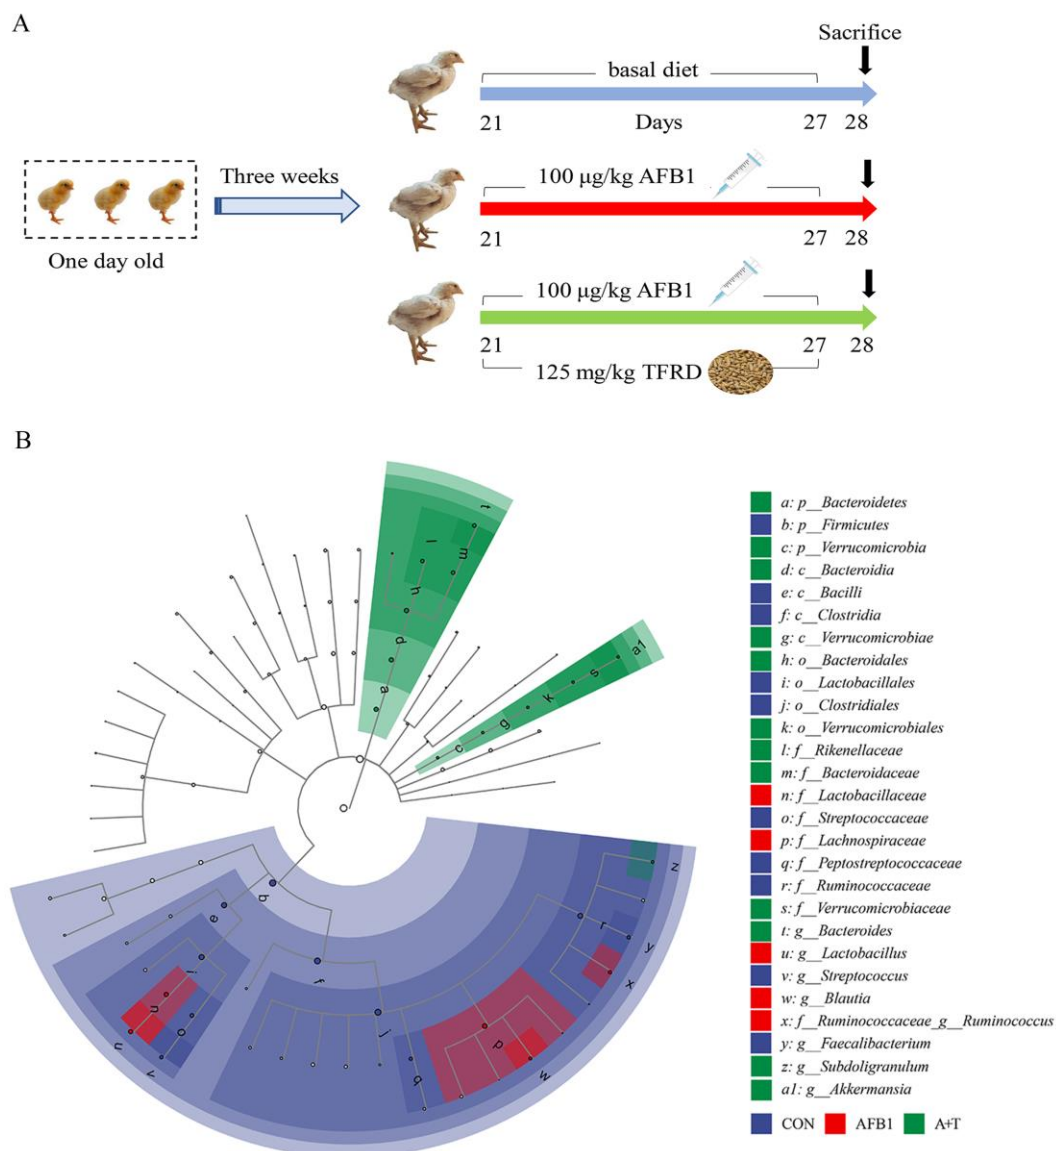

**Fig. S2 (A) Scheme of experiments. (B) Cladogram generated from LEfSe analysis of gut microbiota (LDA score > 3.5).**

27 **Table S2** Primer sequences for quantitative real-time PCR analysis.

| Gens          | Gene bank ID   | Primer sequence (5'-3')                                   | Products length |
|---------------|----------------|-----------------------------------------------------------|-----------------|
| ACSL1         | XM_046916038.1 | F: GACTAATGGTCACAGGAGCAGCAC<br>R: CCAGGCATTGACAGTGAGCATCC | 133             |
| ACSL4         | XM_046917350.1 | F: CAATAGAGCAGAGTACCCTGAG<br>R: TAGAACCACTGGTGTACATGAC    | 146             |
| ACC           | XM_046929960.1 | F: TCCAGCAGAACCGCATTGACAC<br>R: GTATGAGCAGGCAGGACTTGGC    | 187             |
| Claudin-1     | NM_001013611.2 | F: GGGGACAACATCGTGACCG<br>R: AGGAGTCGAAGACTTTGCACT        | 100             |
| CPT-1A        | XM_046918285.1 | F: CACAGGGCTTTGGGTTGC<br>R: TTTACAAGAGTCATCCACAGCTTGG     | 132             |
| FAS           | NM_205155.4    | F: GCTCTGCGTCTGCTTCAGTCTAC<br>R: GGTACAGGACTCTGCCATCAATGC | 96              |
| FTH1          | NM_205086.2    | F: GCCGAGAAACTGATGAAGCTGC<br>R: GCACACTCCATTGCATTCAGCC    | 113             |
| GPX4          | NM_204220.3    | F: AACCAGTTCGGGAAGCAGGA<br>R: ACTTGATGGCATTCCCCAGC        | 181             |
| MUC2          | XM_040673077.2 | F: CAGGATACGTGTGTGCCCCAT<br>R: GGACGCGTTGCAATCAAAGT       | 198             |
| Occludin      | XM_046904540.1 | F: CCTCATCGTCATCCTGCTCT<br>R: GGTCCCAGTAGATGTTGGCT        | 95              |
| PPAR $\alpha$ | XM_046906390.1 | F: TGCTGTGGAGATCGTCCTGGTC<br>R: CTGTGACAAGTTGCCGGAGGTC    | 166             |
| SREBP1        | XM_046900546.1 | F: TTCTTCGTGGACGGGGATTG<br>R: AGCTGAAGGTACTCCAACGC        | 218             |
| GAPDH         | NM-204305.1    | F: CCTCTCTGGCAAAGTCCAAG<br>R: GGTCACGCTCCTGGAAGATA        | 176             |

28 Note: F.Forward primer; R. Reverse primer. ACSL1, acyl-CoA synthetase long chain  
 29 family member 1; ACSL4, acyl-CoA synthetase long chain family member 4; ACC,  
 30 acetyl-CoA carboxylase alpha; CPT-1A, carnitine palmitoyltransferase 1A; FAS, fatty  
 31 acid synthase; FTH1, ferritin heavy chain 1; GPX4, glutathione peroxidase 4; MUC2,  
 32 mucin2; PPAR $\alpha$ , peroxisome proliferator activated receptor alpha; SREBP1, sterol

33 regulatory element binding transcription factor 1; GAPDH, reference gene.

34

35
